# Supplementary material
Source: publisher site journal article supplement (https://www.dovepress.com/article/355010)
Supplement: Supplementary file 1 [file get_supplementary_file.php]

**
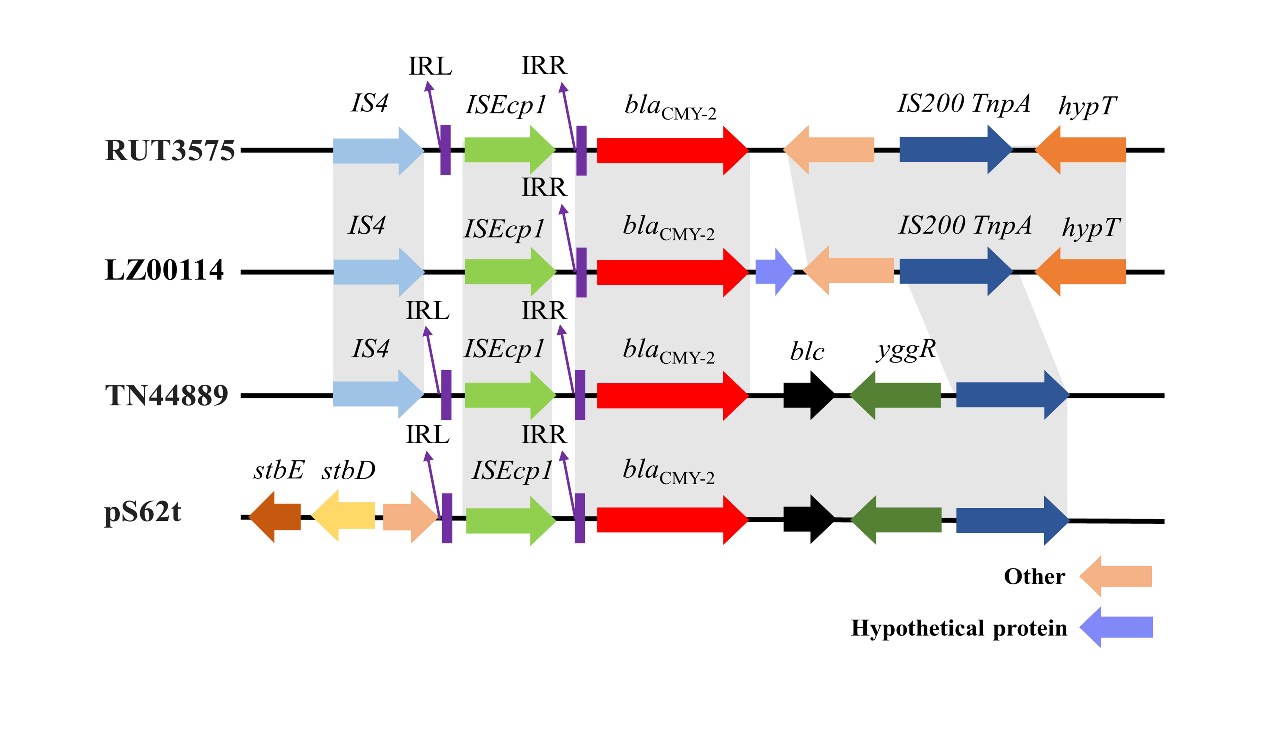
**

**Figure S1** Comparison of the *bla*CMY-2-carrying regions from plasmids and chromosomes. pS62t (GenBank accession number: KP207590.1) and TN44889 (GenBank accession number: FM246884.1) were derived from plasmids. RUT35755 (GenBank accession number: CP048010.1) was derived from chromosome. Homologous regions are highlighted in gray. IRR: right inverted repeats; IRL: left inverted repeat.


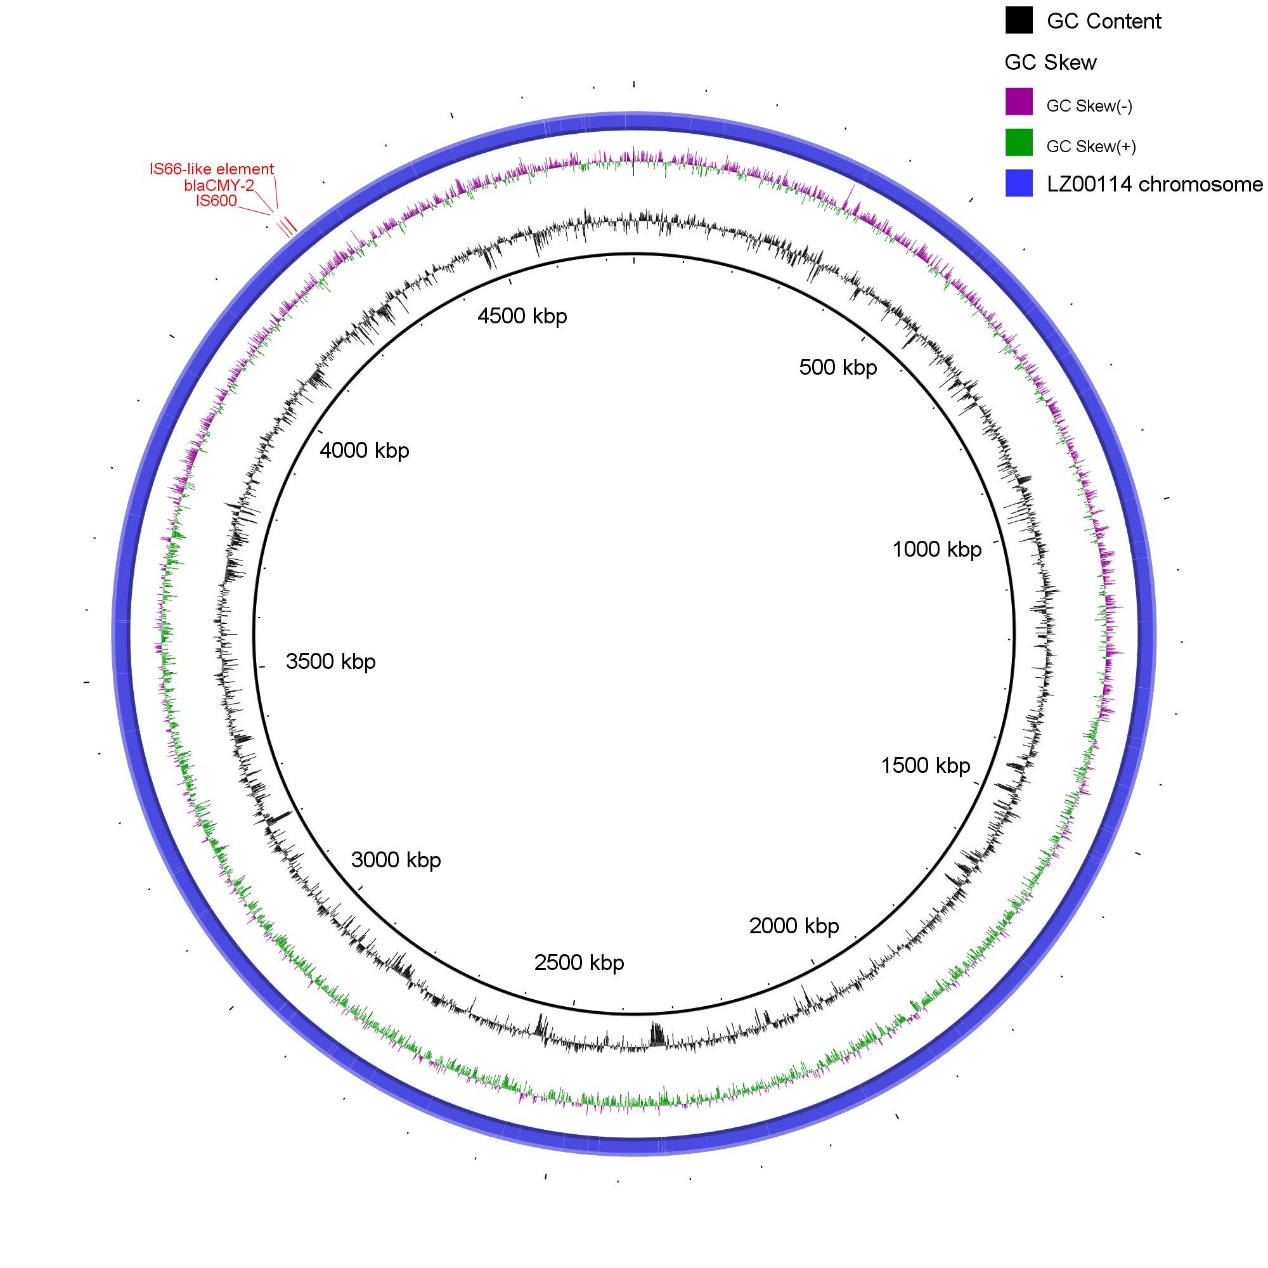


**Figure S2** Sketch map of the chromosome genome of LZ00114. The top left corner was marked *bla*CMY-2, *IS600*, and *IS66*-like element in turn

**Table S1** PCR and RT-PCR primers used in this study

| **Genes** | **For Primer(5’-3’)** | **Rev Primer(5’-3’)** | **References** |
| --- | --- | --- | --- |
| **PCR** | | | |
| *bla*KPC | CATTCAAGGGCTTTCTTGCTGC | ACGACGGCATAGTCATTTGC | 1 |
| *bla*IMP | CATGGTTTGGTTGTTCTTGT | ATAATTTAGCGGACTTTGGC | 2 |
| *bla*VIM | TTATGGAGCAGCAACGATGT | CAAAAGTCCCGCTCCAACGA |
| *bla*NDM | CGGAATGGCTCATCACGATC | GGTTTGGCGATCTGGTTTTC | 3 |
| *bla*OXA-48 | GCTTGATCGCCCTCGATT | GATTTGCTCCGTGGCCGAAA | 4 |
| *mcr-1* | CGGTCAGTCCGTTTGTTC | CTTGGTCGGTCTGTAGGG | 5 |
| *pmrA* | CTGATTGTTGAAGACGATACGC | AGTTTTCCTCATTCGCGACCA | 6 |
| *pmrB* | GAATCTGATGCATTTGCGC | TTATATCTGGTTTGCCACGTACTG |
| *phop* | ATGCGCGTACTGGTTGTTG | AGTACTACCGCTGCCGTTGCC |
| *phoQ* | CAGGGCTATCTGTTCGAATTGCG | ACGGATGCTTAACGTAATGCGTG |
| *pmrD* | CGGTGCGCTGGCTAACTCTGCC | AGTAGCCTGTATTATGAGCGGG |
| **RT-PCR** | | | |
| *emrA* | ACCACGGATATTTACGGCGATGATG | AGGCAGACGCTGAACGACTTTG | This study |
| *emrD* | TTGTGCTGGTGTGACCTTCAGTATG | CCAGACCGCCAATCAGCATCAG | This study |
| *emrY* | TGGCAGGTTGGCACAAAGAATAGG | AGCACATCAAGATTGGTCGATAGGC | This study |
| *eptA* (*pmrC*) | ACGGCGAATGCTATGACGAAGTG | CTGAGGCGGATAGCGGTTGTAATAG | This study |
| *gapA (*internal control*)* | TCCCAGAACATCATCCCGTCCTC | AACGCCATACCAGTCAGTTTGCC | This study |
| *acrA* | CTCTCAGGCAGCTTAGCCCTAA | TGCAGAGGTTCAGTTTTGACTGTT | 7 |
| *acrB* | AGCTTCCTGATGGTTGTCGG | ACGGCTGATGGCATCTTTCA | 7 |
| *acrD* | GCCGTGCAGCAAGTACAAAA | GTATCGCCGGTTTTACGCAC | 7 |
| *pmrA* | CCTTTTGCGCTGGAAGAGT | TCTTTGGGCGTCAGAATCAAC | 8 |
| *pmrB* | CTGCAAGAAGATGACGGAGC | CTGTGTAATGCGGCTGACAA | 8 |
| *dnaE (*internal control*)* | GGACATGAGCACCGAAGATT | GGAAGCCCATCTGGTTGATA | 8 |

**References**:

1. Dallenne C, Da Costa A, Decre D, Favier C, Arlet G. Development of a set of multiplex PCR assays for the detection of genes encoding important beta-lactamases in Enterobacteriaceae. *J Antimicrob Chemother.* 2010;65(3):490-495. doi:10.1093/jac/dkp498

2. Zou H, Jia X, Liu H, Li S, Wu X, Huang S. Emergence of NDM-5-Producing Escherichia coli in a Teaching Hospital in Chongqing, China: IncF-Type Plasmids May Contribute to the Prevalence of bla(NDM-)(5). *Front Microbiol.* 2020;11. doi:10.3389/fmicb.2020.00334

3. Krishnaraju M, Kamatchi C, Jha AK, et al. Complete sequencing of an IncX3 plasmid carrying bla(NDM-5) allele reveals an early stage in the dissemination of the bla(NDM) gene. *Indian J Med Microbiol.* 2015;33(1):30-38. doi:10.4103/0255-0857.148373

4. Woodford N, Ellington MJ, Coelho JM, et al. Multiplex PCR for genes encoding prevalent OXA carbapenemases in Acinetobacter spp. *Int J Antimicrob Agents.* 2006;27(4):351-353. doi:10.1016/j.ijantimicag.2006.01.004

5. Liu Y-Y, Wang Y, Walsh TR, et al. Emergence of plasmid-mediated colistin resistance mechanism MCR-1 in animals and human beings in China: a microbiological and molecular biological study. *Lancet Infect Dis.* 2016;16(2):161-168. doi:10.1016/s1473-3099(15)00424-7

6. Kim S, Woo JH, Kim N, et al. Characterization Of Chromosome-Mediated Colistin Resistance In Escherichia coli Isolates From Livestock In Korea. *Infect Drug Resist.* 2019;12:3291-3299. doi:10.2147/idr.S225383

7. Chetri S, Bhowmik D, Paul D, et al. AcrAB-TolC efflux pump system plays a role in carbapenem non-susceptibility in Escherichia coli. *BMC Microbiol.* 2019;19(1). doi:10.1186/s12866-019-1589-1

8. Huang J, Dai X, Ge L, et al. Sequence Duplication Within pmrB Gene Contribute to High-Level Colistin Resistance in Avian Pathogenic Escherichia coli. *Microb Drug Resist.* 2020;26(12):1442-1451. doi:10.1089/mdr.2019.0290

**Table S2** MICs of transconjugants

| Strains | Cefepime | Cefepime | Meropenem | Ciprofloxacin | Tetracycline | Gentamicin | Polymyxin B |
| --- | --- | --- | --- | --- | --- | --- | --- |
| *E.coli* J53 | 1 | 1 | 0.5 | 0.025 | 1 | 2 | 1 |
| *E.coli* J53+ p25NDM-5 | 256 | 256 | 8 | 0.025 | 1 | 2 | 1 |
